# Supplementary material for: Pyrethroid Pesticide Exposure and Parental Report of Learning Disability and Attention Deficit/Hyperactivity Disorder in U.S. Children: NHANES 1999–2002
Source: PubMed Central journal article supplement (PMC4256700; doi:10.1289/ehp.1308031), 2014-09-05
Supplement: ehp.1308031.s001.508.pdf [file ehp.1308031.s001.508.pdf]

**Supplemental Material**

**Pyrethroid Pesticide Exposure and Parental Report of Learning  
Disability and Attention Deficit/Hyperactivity Disorder in U.S.  
Children: NHANES 1999–2002**

Lesliam Quirós-Alcalá, Suril Mehta, and Brenda Eskenazi

**Table S1.** Demographic/personal characteristics and environmental factors for study participants with and without pyrethroid metabolite data [n (%)].<sup>a</sup>

| Children's characteristics                           | All children<br>n = 4672 | Children with<br>3-PBA (n = 1861) | Children without<br>3-PBA (n = 2811) | Children with<br><i>cis</i> -DCCA (n = 1839) | Children without<br><i>cis</i> -DCCA (n = 2833) | Children with<br><i>trans</i> -DCCA (n = 1848) | Children without<br><i>trans</i> -DCCA (n = 2824) |
|------------------------------------------------------|--------------------------|-----------------------------------|--------------------------------------|----------------------------------------------|-------------------------------------------------|------------------------------------------------|---------------------------------------------------|
| <b>Gender</b>                                        |                          |                                   |                                      |                                              |                                                 |                                                |                                                   |
| Male                                                 | 2308 (51.4)              | 899 (51.7)                        | 1409 (52.1)                          | 885 (51.4)                                   | 1423 (52.2)                                     | 891 (51.6)                                     | 1417 (52.1)                                       |
| Female                                               | 2364 (48.6)              | 962 (48.3)                        | 1402 (47.9)                          | 954 (48.6)                                   | 1410 (47.8)                                     | 957 (48.4)                                     | 1407 (47.9)                                       |
| Missing                                              | 0                        | 0                                 | 0                                    | 0                                            | 0                                               | 0                                              | 0                                                 |
| <b>Race/ethnicity</b>                                |                          |                                   |                                      |                                              |                                                 |                                                |                                                   |
| Non-Hispanic White                                   | 1201 (60.0)              | 466 (58.5)                        | 735 (61.7)                           | 460 (58.5)                                   | 741 (61.7)                                      | 462 (58.4)                                     | 739 (61.7)                                        |
| Non-Hispanic Black                                   | 1450 (14.9)              | 596 (14.6)                        | 854 (14.3)                           | 594 (14.7)                                   | 856 (14.2)                                      | 590 (14.5)                                     | 860 (14.3)                                        |
| Mexican American                                     | 1639 (11.6)              | 625 (11.3)                        | 1014 (11.8)                          | 612(11.1)                                    | 1027(11.9)                                      | 623 (11.4)                                     | 1016 (11.7)                                       |
| Other                                                | 383 (13.5)               | 174 (15.7)                        | 208 (12.2)                           | 173 (15.7)                                   | 209 (12.2)                                      | 173 (15.7)                                     | 209 (12.2)                                        |
| Missing                                              | 0                        | 0                                 | 0                                    | 0                                            | 0                                               | 0                                              | 0                                                 |
| <b>Poverty-income-ratio (PIR)</b>                    |                          |                                   |                                      |                                              |                                                 |                                                |                                                   |
| < 0.94                                               | 1323 (21.7)              | 549 (22.9)                        | 774 (20.6)                           | 540 (22.7)                                   | 783 (20.7)                                      | 542 (22.7)                                     | 781 (20.7)                                        |
| 0.94-1.80                                            | 1096 (23.5)              | 441 (24.0)                        | 655 (23.0)                           | 435 (23.9)                                   | 661 (23.0)                                      | 439 (24.0)                                     | 657 (23.0)                                        |
| 1.81-3.56                                            | 992 (27.1)               | 387 (25.9)                        | 605 (28.1)                           | 382 (25.9)                                   | 610 (28.1)                                      | 384 (25.9)                                     | 608 (28.1)                                        |
| > 3.56                                               | 810 (27.7)               | 318 (27.2)                        | 492 (28.4)                           | 317 (27.5)                                   | 493 (28.2)                                      | 318 (27.4)                                     | 492 (28.2)                                        |
| Missing                                              | 451                      | 166                               | 285                                  | 165                                          | 286                                             | 165                                            | 286                                               |
| <b>Household reference person's education level</b>  |                          |                                   |                                      |                                              |                                                 |                                                |                                                   |
| < High school                                        | 1750 (24.2)              | 688 (24.7)                        | 1062 (23.9)                          | 678 (24.7)                                   | 1072 (23.8)                                     | 683 (24.7)                                     | 1067 (23.8)                                       |
| High school                                          | 1113 (27.7)              | 438 (25.9)                        | 675 (28.8)                           | 431 (25.6)                                   | 682 (29.1)                                      | 434 (25.7)                                     | 679 (29.0)                                        |
| > High school                                        | 1637 (48.1)              | 663 (49.4)                        | 974 (47.3)                           | 658 (49.7)                                   | 979 (47.1)                                      | 659 (49.6)                                     | 978 (47.2)                                        |
| Missing                                              | 172                      | 72                                | 100                                  | 72                                           | 100                                             | 72                                             | 100                                               |
| <b>Low birth weight (&lt; 2500g)</b>                 |                          |                                   |                                      |                                              |                                                 |                                                |                                                   |
| Yes                                                  | 397 (7.5)                | 160 (7.4)                         | 239 (7.7)                            | 155 (7.3)                                    | 242 (7.7)                                       | 157 (7.3)                                      | 240 (7.6)                                         |
| No                                                   | 4077 (92.5)              | 1629 (92.6)                       | 2446 (92.3)                          | 1613 (92.7)                                  | 2464 (92.3)                                     | 1621 (92.7)                                    | 2456 (92.4)                                       |
| Missing                                              | 198                      | 72                                | 126 (4.5)                            | 71                                           | 127                                             | 70                                             | 128                                               |
| <b>Age</b>                                           |                          |                                   |                                      |                                              |                                                 |                                                |                                                   |
| 6-7 years                                            | 751 (21.0)               | 333 (19.8)                        | 418 (20.2)                           | 326 (19.5)                                   | 425 (20.4)                                      | 329 (19.6)                                     | 422 (20.3)                                        |
| 8-9 years                                            | 771 (19.7)               | 377 (20.4)                        | 394 (17.3)                           | 374 (20.5)                                   | 397 (17.3)                                      | 277 (20.5)                                     | 394 (17.2)                                        |
| 10-11 years                                          | 737 (19.7)               | 339 (18.3)                        | 398 (18.9)                           | 334 (18.3)                                   | 403 (18.9)                                      | 334 (18.2)                                     | 403 (19.0)                                        |
| 12-13 years                                          | 1251 (20.0)              | 411 (20.6)                        | 840 (22.2)                           | 406 (20.6)                                   | 845 (22.1)                                      | 408 (20.1)                                     | 843 (22.1)                                        |
| 14-15 years                                          | 1162 (19.6)              | 401 (20.9)                        | 761 (21.4)                           | 399 (21.1)                                   | 763 (21.3)                                      | 400 (21.1)                                     | 762 (21.3)                                        |
| Missing                                              | 0                        | 0                                 | 0                                    | 0                                            | 0                                               | 0                                              | 0                                                 |
| <b>Neonatal intensive care unit (NICU) admission</b> |                          |                                   |                                      |                                              |                                                 |                                                |                                                   |
| Yes                                                  | 516 (11.7)               | 205 (12.0)                        | 311 (11.3)                           | 204 (12.1)                                   | 312 (11.3)                                      | 203 (12.0)                                     | 313 (11.3)                                        |
| No                                                   | 4115 (88.3)              | 1641 (88.0)                       | 2474 (88.7)                          | 1620 (87.9)                                  | 2495 (88.7)                                     | 1630 (88.0)                                    | 2485 (88.7)                                       |
| Missing                                              | 41                       | 15                                | 26                                   | 15                                           | 26                                              | 15                                             | 26                                                |
| <b>Attended daycare or preschool</b>                 |                          |                                   |                                      |                                              |                                                 |                                                |                                                   |
| Yes                                                  | 3077 (72.9)              | 1229 (71.6)                       | 1848 (73.9)                          | 1219 (71.9)                                  | 1858 (73.7)                                     | 1224 (72.0)                                    | 1853 (73.6)                                       |
| No                                                   | 1588 (27.1)              | 630 (28.4)                        | 958 (26.1)                           | 618 (28.1)                                   | 970 (26.3)                                      | 622 (28.0)                                     | 966 (26.4)                                        |
| Missing                                              | 7                        | 2                                 | 5                                    | 2                                            | 5                                               | 2                                              | 5                                                 |

| Children's characteristics                               | All children<br>n = 4672 | Children with<br>3-PBA (n = 1861) | Children without<br>3-PBA (n = 2811) | Children with<br><i>cis</i> -DCCA (n = 1839) | Children without<br><i>cis</i> -DCCA (n = 2833) | Children with<br><i>trans</i> -DCCA (n = 1848) | Children without<br><i>trans</i> -DCCA (n = 2824) |
|----------------------------------------------------------|--------------------------|-----------------------------------|--------------------------------------|----------------------------------------------|-------------------------------------------------|------------------------------------------------|---------------------------------------------------|
| <b>Health insurance</b>                                  |                          |                                   |                                      |                                              |                                                 |                                                |                                                   |
| Yes                                                      | 3774 (81.2)              | 1492 (82.8)                       | 2282 (88.7)                          | 1474 (82.7)                                  | 2300 (88.7)                                     | 1479 (82.7)                                    | 2295 (88.7)                                       |
| No                                                       | 837 (13.8)               | 348 (17.2)                        | 489 (11.3)                           | 344 (17.3)                                   | 493 (11.3)                                      | 348 (17.3)                                     | 489 (11.3)                                        |
| Missing                                                  | 61                       | 21                                | 40                                   | 21                                           | 40                                              | 21                                             | 40                                                |
| <b>Total DAPs</b>                                        |                          |                                   |                                      |                                              |                                                 |                                                |                                                   |
| < 3.15 x 10 <sup>-8</sup> mol/L                          | 517 (30.3)               | 517 (30.5)                        | 0                                    | 512(30.3)                                    | 5 (60.1)                                        | 515 (30.4)                                     | 2 (46.5)                                          |
| 3.15 x 10 <sup>-8</sup> to 1.14 x 10 <sup>-7</sup> mol/L | 594 (31.0)               | 594 (31.1)                        | 0                                    | 589 (31.2)                                   | 5 (15.3)                                        | 592 (31.2)                                     | 2 (6.7)                                           |
| > 1.14 x 10 <sup>-7</sup> mol/L                          | 719 (38.7)               | 718 (38.4)                        | 1 (100)                              | 712 (38.5)                                   | 7 (25.6)                                        | 715 (38.4)                                     | 4 (46.8)                                          |
| Missing                                                  | 2842                     | 32                                | 2810                                 | 26                                           | 2816                                            | 26                                             | 2816                                              |
| <b>Blood lead level</b>                                  |                          |                                   |                                      |                                              |                                                 |                                                |                                                   |
| 0.2-1.2 µg/dL                                            | 2008 (52.8)              | 771 (50.1)                        | 1237 (55.6)                          | 762 (50.2)                                   | 1246 (55.5)                                     | 769 (50.3)                                     | 1239 (55.4)                                       |
| 1.3-2.1 µg/dL                                            | 1265 (30.5)              | 522 (31.4)                        | 743 (29.5)                           | 516 (31.5)                                   | 749 (29.4)                                      | 519 (31.5)                                     | 746 (29.4)                                        |
| > 2.1 µg/dL                                              | 862 (16.7)               | 369 (18.5)                        | 493 (14.9)                           | 363 (18.3)                                   | 499 (15.1)                                      | 363 (18.2)                                     | 499 (15.2)                                        |
| Missing                                                  | 537                      | 199                               | 338                                  | 198                                          | 339                                             | 197                                            | 340                                               |
| <b>Serum cotinine</b>                                    |                          |                                   |                                      |                                              |                                                 |                                                |                                                   |
| Lower 50 (< 0.06 ng/ml)                                  | 1670 (42.9)              | 650 (41.3)                        | 1020 (44.2)                          | 638 (41.4)                                   | 1032 (44.0)                                     | 649 (41.6)                                     | 1021 (43.9)                                       |
| Upper 50 (0.06-9.99 ng/mL) ng/ml)                        | 2210 (54.5)              | 910 (55.7)                        | 1300 (53.2)                          | 902 (55.5)                                   | 1308 (53.4)                                     | 901 (55.3)                                     | 1309 (53.5)                                       |
| ≥ 10 ng/ml                                               | 91 (2.6)                 | 35 (3.1)                          | 56 (2.6)                             | 35 (3.1)                                     | 56 (2.5)                                        | 35 (3.1)                                       | 56 (2.6)                                          |
| Missing                                                  | 701                      | 266                               | 435                                  | 264                                          | 437                                             | 263                                            | 438                                               |
| <b>Creatinine</b>                                        |                          |                                   |                                      |                                              |                                                 |                                                |                                                   |
| < 92 mg/dL                                               | 1481 (37.2)              | 685 (38.8)                        | 796 (34.7)                           | 673 (38.6)                                   | 808 (34.9)                                      | 680 (38.6)                                     | 801 (34.9)                                        |
| 92-164 mg/dL                                             | 1742 (39.3)              | 717 (39.3)                        | 1025 (39.1)                          | 709 (39.3)                                   | 1033 (39.1)                                     | 713 (39.4)                                     | 1029 (39.0)                                       |
| > 164 mg/dL                                              | 1276 (23.5)              | 459 (21.8)                        | 817 (26.2)                           | 457 (22.0)                                   | 819 (26.1)                                      | 455 (21.9)                                     | 821 (26.1)                                        |
| Missing                                                  | 173                      | 0                                 | 173                                  | 0                                            | 173                                             | 0                                              | 173                                               |
| <b>Mother's age at birth</b>                             |                          |                                   |                                      |                                              |                                                 |                                                |                                                   |
| < 25 years                                               | 2215 (41.7)              | 861 (41.8)                        | 1354 (41.4)                          | 853 (41.9)                                   | 1362 (41.3)                                     | 856 (42.0)                                     | 1359 (41.3)                                       |
| 25–34 years                                              | 2015 (47.8)              | 836 (49.2)                        | 1179 (47.1)                          | 822 (49.0)                                   | 1193 (47.3)                                     | 829 (48.9)                                     | 1186 (47.3)                                       |
| 35+ years                                                | 373 (10.5)               | 135 (9.0)                         | 238 (11.5)                           | 135 (9.1)                                    | 238 (11.4)                                      | 135 (9.1)                                      | 238 (11.4)                                        |
| Missing                                                  | 69                       | 29                                | 40                                   | 29                                           | 40                                              | 28                                             | 41                                                |
| <b>Mother smoked during pregnancy</b>                    |                          |                                   |                                      |                                              |                                                 |                                                |                                                   |
| Yes                                                      | 647 (18.3)               | 265 (18.7)                        | 382 (18.1)                           | 263 (18.7)                                   | 384 (18.1)                                      | 261 (18.7)                                     | 386 (18.1)                                        |
| No                                                       | 3952 (81.7)              | 1566 (81.3)                       | 2386 (81.9)                          | 1546 (81.3)                                  | 2406 (81.9)                                     | 1557 (81.3)                                    | 2395 (81.9)                                       |
| Missing                                                  | 73                       | 30                                | 43                                   | 30                                           | 43                                              | 30                                             | 43                                                |

<sup>a</sup>Percent values provided in parentheses are weighted.

**Table S2.** Prevalence of outcomes for study participants with and without pyrethroid urinary metabolite data [n (%)].

| <b>Neurodevelopmental outcome</b> | <b>All children (n = 4672)</b> | <b>Children with 3-PBA (n = 1861)</b> | <b>Children without 3-PBA (n = 2811)</b> | <b>Children with <i>cis</i>-DCCA (n = 1839)</b> | <b>Children without <i>cis</i>-DCCA (n = 2833)</b> | <b>Children with <i>trans</i>-DCCA (n = 1848)</b> | <b>Children without <i>trans</i>-DCCA (n = 2824)</b> |
|-----------------------------------|--------------------------------|---------------------------------------|------------------------------------------|-------------------------------------------------|----------------------------------------------------|---------------------------------------------------|------------------------------------------------------|
| <b>LD</b>                         |                                |                                       |                                          |                                                 |                                                    |                                                   |                                                      |
| Yes                               | 544 (11.5)                     | 223 (12.7)                            | 321 (11.2)                               | 221 (12.8)                                      | 323 (11.1)                                         | 221 (12.7)                                        | 323 (11.2)                                           |
| No                                | 4118 (88.5)                    | 1636 (87.3)                           | 2482 (88.8)                              | 1616 (87.2)                                     | 2502 (88.9)                                        | 1625 (87.3)                                       | 2493 (88.8)                                          |
| Missing                           | 10                             | 2                                     | 8                                        | 2                                               | 8                                                  | 2                                                 | 8                                                    |
| <b>ADHD</b>                       |                                |                                       |                                          |                                                 |                                                    |                                                   |                                                      |
| Yes                               | 342 (9.3)                      | 148 (10.0)                            | 194 (9.1)                                | 146 (9.9)                                       | 196 (9.2)                                          | 147 (9.9)                                         | 195 (9.2)                                            |
| No                                | 4320 (90.7)                    | 1708 (90.0)                           | 2612 (90.9)                              | 1688 (90.1)                                     | 2632 (90.8)                                        | 1697 (90.1)                                       | 2623 (90.8)                                          |
| Missing                           | 10                             | 5                                     | 5                                        | 5                                               | 5                                                  | 4                                                 | 6                                                    |
| <b>LD+ADHD</b>                    |                                |                                       |                                          |                                                 |                                                    |                                                   |                                                      |
| Yes                               | 174 (4.3)                      | 78 (5.4)                              | 96 (3.8)                                 | 77 (5.4)                                        | 97 (3.8)                                           | 78 (5.4)                                          | 96 (3.8)                                             |
| No                                | 4479 (95.7)                    | 1776 (94.6)                           | 2703 (96.2)                              | 1755 (94.6)                                     | 2724 (96.2)                                        | 1764 (94.6)                                       | 2715 (96.2)                                          |
| Missing                           | 19                             | 7                                     | 12                                       | 7                                               | 12                                                 | 6                                                 | 13                                                   |

**Table S3.** ORs for LD, ADHD, and both LD and ADHD for every 10-fold increase in urinary 3-PBA concentrations including and excluding select variables as a covariates in the final models.<sup>a,b</sup>

| Neurodevelopmental outcome                        | cOR (95% CI)      | p-value | aOR (95% CI)      | p-value | aOR <sub>creat</sub> (95% CI) | p-value |
|---------------------------------------------------|-------------------|---------|-------------------|---------|-------------------------------|---------|
| <b>Including PIR (n = 1551)</b>                   |                   |         |                   |         |                               |         |
| LD                                                | 1.18 (0.90, 1.56) | 0.24    | 1.08 (0.80, 1.48) | 0.61    | 1.00 (0.70, 1.41)             | 0.98    |
| ADHD                                              | 1.18 (0.84, 1.66) | 0.34    | 1.07 (0.74, 1.57) | 0.72    | 0.98 (0.65, 1.46)             | 0.90    |
| LD+ADHD                                           | 1.43 (0.86, 2.36) | 0.17    | 1.24 (0.74, 2.07) | 0.42    | 1.10 (0.64, 1.87)             | 0.73    |
| <b>Excluding PIR (n = 1551)</b>                   |                   |         |                   |         |                               |         |
| LD                                                | 1.18 (0.90, 1.56) | 0.23    | 1.13 (0.83, 1.54) | 0.43    | 1.04 (0.73, 1.48)             | 0.82    |
| ADHD                                              | 1.18 (0.84, 1.66) | 0.34    | 1.09 (0.76, 1.56) | 0.65    | 0.99 (0.66, 1.46)             | 0.94    |
| LD+ADHD                                           | 1.43 (0.86, 2.36) | 0.17    | 1.32 (0.76, 2.28) | 0.32    | 1.16 (0.65, 2.05)             | 0.62    |
| <b>Including total DAPs (n = 1652)</b>            |                   |         |                   |         |                               |         |
| LD                                                | 1.27 (1.02, 1.58) | 0.04    | 1.16 (0.90, 1.50) | 0.25    | 1.11 (0.82, 1.49)             | 0.50    |
| ADHD                                              | 1.26 (0.96, 1.64) | 0.09    | 1.11 (0.81, 1.51) | 0.52    | 1.05 (0.75, 1.46)             | 0.79    |
| LD+ADHD                                           | 1.55 (1.04, 2.32) | 0.03    | 1.33 (0.85, 2.08) | 0.21    | 1.26 (0.78, 2.03)             | 0.34    |
| <b>Excluding total DAPs (n = 1652)</b>            |                   |         |                   |         |                               |         |
| LD                                                | 1.27 (1.02, 1.58) | 0.04    | 1.19 (0.93, 1.53) | 0.17    | 1.11 (0.83, 1.49)             | 0.47    |
| ADHD                                              | 1.26 (0.96, 1.64) | 0.09    | 1.15 (0.85, 1.57) | 0.36    | 1.06 (0.76, 1.47)             | 0.73    |
| LD+ADHD                                           | 1.55 (1.04, 2.32) | 0.03    | 1.45 (0.92, 2.26) | 0.11    | 1.30 (0.82, 2.08)             | 0.26    |
| <b>Including blood lead (n = 1511)</b>            |                   |         |                   |         |                               |         |
| LD                                                | 1.32 (1.07, 1.64) | 0.01    | 1.23 (0.95, 1.59) | 0.11    | 1.16 (0.87, 1.57)             | 0.31    |
| ADHD                                              | 1.36 (1.05, 1.78) | 0.02    | 1.24 (0.93, 1.64) | 0.14    | 1.18 (0.87, 1.59)             | 0.30    |
| LD+ADHD                                           | 1.78 (1.22, 2.58) | 0.003   | 1.63 (1.01, 2.65) | 0.05    | 1.49 (0.89, 2.51)             | 0.13    |
| <b>Excluding blood lead (n = 1511)</b>            |                   |         |                   |         |                               |         |
| LD                                                | 1.32 (1.07, 1.64) | 0.01    | 1.26 (0.97, 1.65) | 0.09    | 1.20 (0.88, 1.64)             | 0.25    |
| ADHD                                              | 1.36 (1.05, 1.78) | 0.02    | 1.26 (0.94, 1.68) | 0.12    | 1.20 (0.88, 1.64)             | 0.25    |
| LD+ADHD                                           | 1.78 (1.22, 2.58) | 0.003   | 1.74 (1.09, 2.78) | 0.02    | 1.61 (0.99, 2.62)             | 0.06    |
| <b>Including serum cotinine (n = 1451)</b>        |                   |         |                   |         |                               |         |
| LD                                                | 1.32 (1.07, 1.62) | 0.01    | 1.24 (0.95, 1.61) | 0.12    | 1.17 (0.87, 1.59)             | 0.30    |
| ADHD                                              | 1.38 (1.05, 1.83) | 0.02    | 1.27 (0.92, 1.76) | 0.15    | 1.21 (0.85, 1.72)             | 0.28    |
| LD+ADHD                                           | 1.77 (1.22, 2.57) | 0.003   | 1.73 (1.08, 2.77) | 0.02    | 1.60 (0.97, 2.63)             | 0.06    |
| <b>Excluding serum cotinine (n = 1451)</b>        |                   |         |                   |         |                               |         |
| LD                                                | 1.32 (1.07, 1.62) | 0.01    | 1.28 (0.98, 1.66) | 0.07    | 1.21 (0.86, 1.65)             | 0.23    |
| ADHD                                              | 1.38 (1.05, 1.83) | 0.02    | 1.30 (0.95, 1.79) | 0.10    | 1.24 (0.88, 1.75)             | 0.22    |
| LD+ADHD                                           | 1.77 (1.22, 2.57) | 0.003   | 1.78 (1.13, 2.81) | 0.01    | 1.63 (1.00, 2.66)             | 0.05    |
| <b>Including all chemicals and PIR (n = 1333)</b> |                   |         |                   |         |                               |         |
| LD                                                | 1.28 (1.01, 1.61) | 0.03    | 1.14 (0.85, 1.52) | 0.39    | 1.05 (0.76, 1.46)             | 0.76    |
| ADHD                                              | 1.32 (0.96, 1.81) | 0.09    | 1.16 (0.81, 1.65) | 0.42    | 1.11 (0.76, 1.60)             | 0.59    |
| LD+ADHD                                           | 1.66 (1.11, 2.47) | 0.01    | 1.33 (0.84, 2.13) | 0.23    | 1.21 (0.76, 1.92)             | 0.43    |
| <b>Excluding all chemicals and PIR (n = 1333)</b> |                   |         |                   |         |                               |         |
| LD                                                | 1.28 (1.01, 1.61) | 0.03    | 1.25 (0.94, 1.66) | 0.12    | 1.16 (0.83, 1.61)             | 0.40    |
| ADHD                                              | 1.32 (0.96, 1.81) | 0.09    | 1.23 (0.88, 1.73) | 0.23    | 1.16 (0.80, 1.68)             | 0.44    |
| LD+ADHD                                           | 1.66 (1.11, 2.47) | 0.01    | 1.65 (1.04, 2.61) | 0.03    | 1.45 (0.91, 2.33)             | 0.12    |

Abbreviations: cOR=Crude odds ratio; aOR=Adjusted odds ratio; aOR<sub>creat</sub>=Adjusted odds ratio including urine creatinine concentration as a covariate in the model.

<sup>a</sup>Sample size for each model was based on the number of children with complete information on exposure, outcome, and covariates. <sup>b</sup>Models were adjusted for sex, age, race/ethnicity, household reference education level, low birth weight status, maternal age at child's birth, NICU admission, maternal smoking during pregnancy, daycare/preschool attendance, and health insurance.

**Table S4.** Pyrethroid metabolite descriptive statistics by NHANES cycle year for children 6 to 15 years of age.

| <b>Pyrethroid metabolite</b>            | <b>Cycle year 1999-2000</b> | <b>Cycle year 2000-2001</b> |
|-----------------------------------------|-----------------------------|-----------------------------|
| <b>3-PBA</b>                            |                             |                             |
| N                                       | 841                         | 1020                        |
| N (%) with detectable concentrations    | 623 (74.1)                  | 811 (79.5)                  |
| GM (95% CI) (µg/L)                      | 0.35 (0.24, 0.50)           | 0.29 (0.23, 0.38)           |
| <b>p-value comparing GM<sup>a</sup></b> | 0.42                        |                             |
| <b>cis-DCCA</b>                         |                             |                             |
| N                                       | 819                         | 1020                        |
| N (%) with detectable concentrations    | 349 (42.6)                  | 305 (29.9)                  |
| <b>p-value<sup>b</sup></b>              | 0.0001                      |                             |
| <b>trans-DCCA</b>                       |                             |                             |
| N                                       | 833                         | 1015                        |
| N (%) with detectable concentrations    | 322 (38.7)                  | 304 (30.0)                  |
| <b>p-value<sup>b</sup></b>              | 0.006                       |                             |

<sup>a</sup>T-test p-value comparing 3-PBA concentrations between cycle year. <sup>b</sup>Chi-square p-value comparing detection rates of *cis*- and *trans*-DCCA by cycle year.
